# Supplementary material
Source: PubMed Central journal article supplement (PMC7070151)
Supplement: skaa063_suppl_supplemental_file_1.pdf [file skaa063_suppl_supplemental_file_1.pdf]

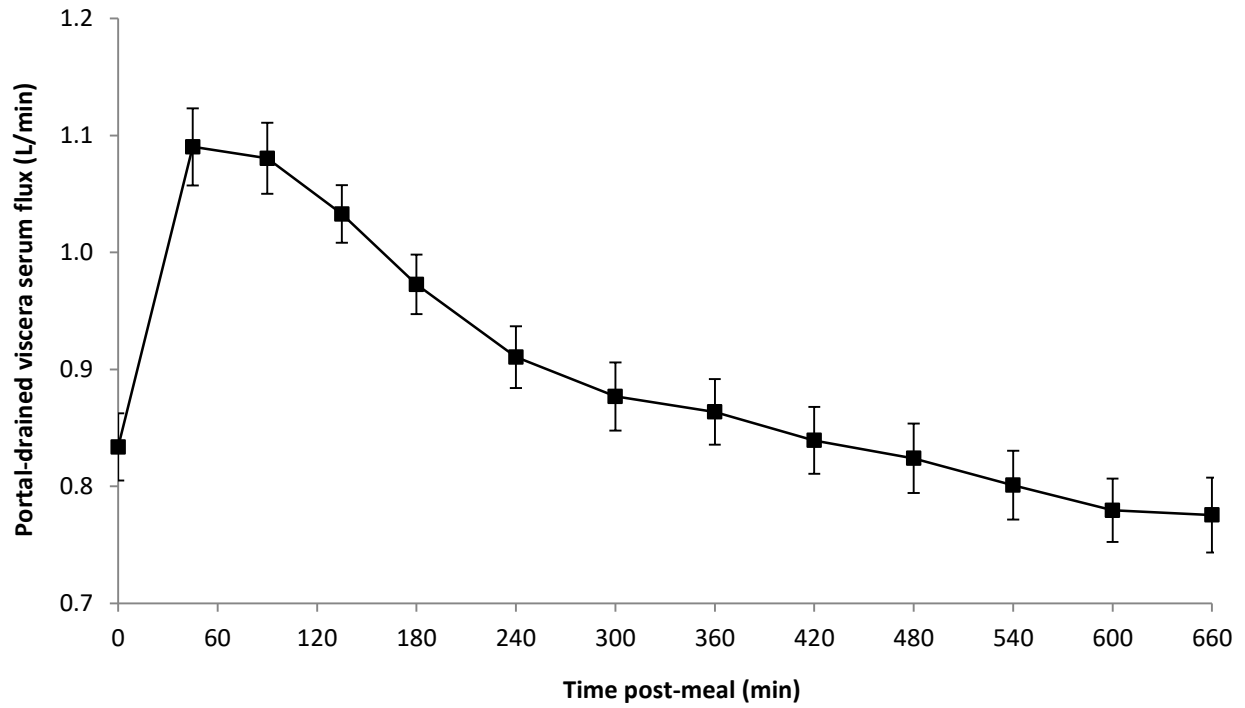

**Supplemental file 1** - Average portal-drained viscera serum flux (L/min) within 660 post-prandial minutes across treatments, presented as LS means  $\pm$  SEM. Time effect ( $P < 0.001$ ).
