# Supplementary material
Source: PubMed Central journal article supplement (PMC7070151)
Supplement: skaa063_suppl_supplemental_file_3.pdf [file skaa063_suppl_supplemental_file_3.pdf]

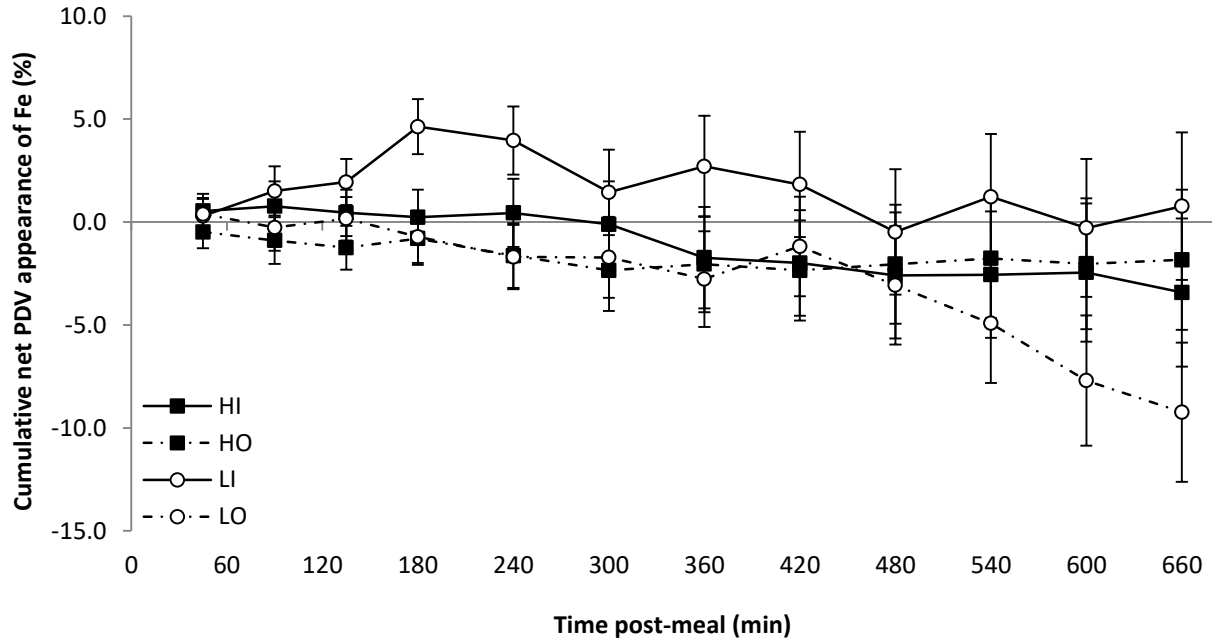

**Supplemental file 3** - Cumulative net portal-drained viscera appearance of iron (% of dietary intake) within 660 post-prandial minutes, according to dietary treatments, presented as LS means  $\pm$  SEM. Source effect at 180 and 240 minutes ( $P \leq 0.02$ ). Inorganic Fe was or tended to be different from zero at 180 and 240 minutes ( $P \leq 0.07$ ). Except for inorganic Fe at 180 ( $P = 0.02$ ) and 240 ( $P = 0.07$ ) minutes post-meal, all other values were not different from zero ( $P \geq 0.14$ ).
