# Supplementary material
Source: PubMed Central journal article supplement (PMC7070151)
Supplement: skaa063_suppl_supplemental_file_4.pdf [file skaa063_suppl_supplemental_file_4.pdf]

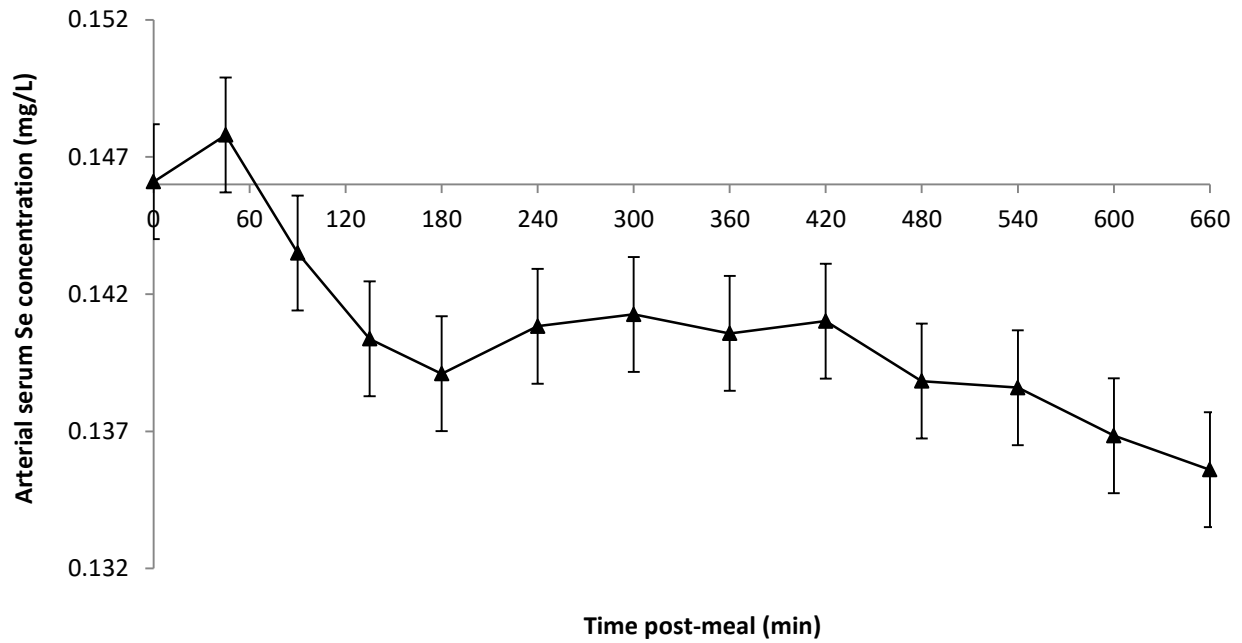

**Supplemental file 4** - Average arterial serum selenium concentration (mg/L) within 660 post-prandial minutes, across treatments, presented as LS means  $\pm$  SEM. Time effect ( $P < 0.001$ ).
