# Supplementary material
Source: PubMed Central journal article supplement (PMC7070151)
Supplement: skaa063_suppl_supplemental_file_5.pdf [file skaa063_suppl_supplemental_file_5.pdf]

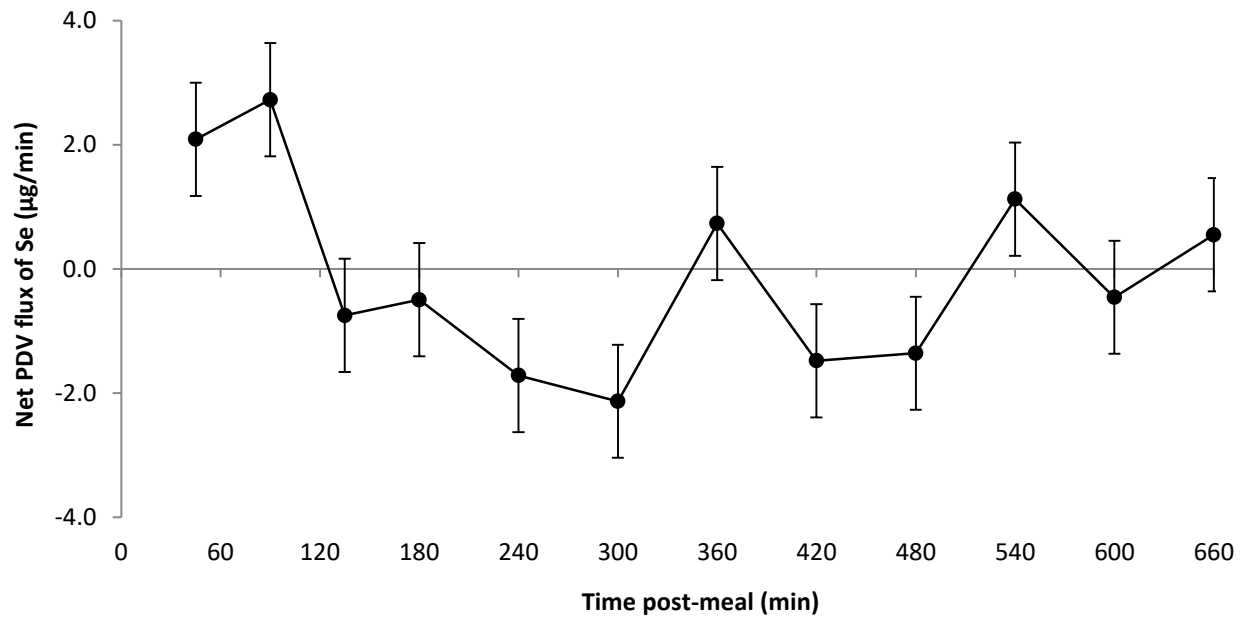

**Supplemental file 5** - Average net portal-drained flux of selenium ( $\mu\text{g}/\text{min}$ ) within 660 post-prandial minutes, across treatments, presented as LS means  $\pm$  SEM. Time effect ( $P < 0.001$ ).
