# Supplementary material
Source: PubMed Central journal article supplement (PMC7070151)
Supplement: skaa063_suppl_supplemental_file_6.pdf [file skaa063_suppl_supplemental_file_6.pdf]

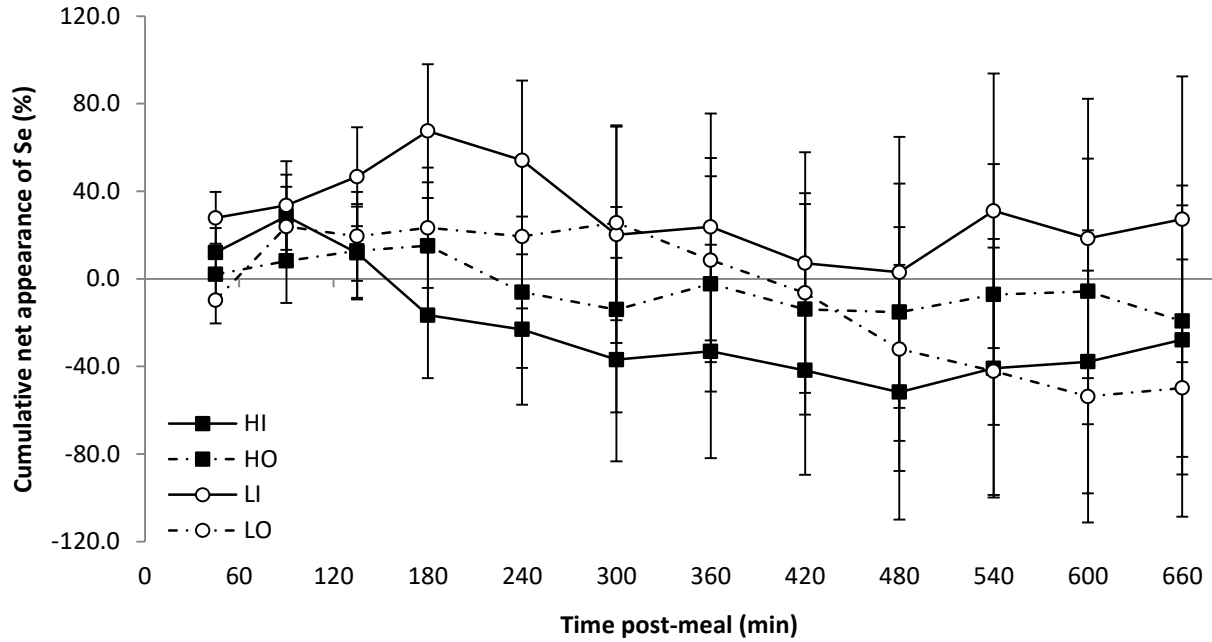

**Supplementary file 6** - Cumulative net portal-drained viscera appearance of selenium (% of dietary intake) within 660 post-prandial minutes, according to dietary treatments, presented as LS means  $\pm$  SEM. Source effect at 45 minutes ( $P = 0.04$ ). Inorganic Fe was different from zero at 45 minutes ( $P = 0.02$ ).
